# Supplementary material for: Contact Between Police and People With Mental Disorders: A Review of Rates
Source: Atypon-hosted journal article supplement (doi:10.1176/appi.ps.201500312), 2016-04-15
Supplement: appi.ps.201500312.ds001.pdf [file appi.ps.201500312.ds001.pdf]

*Table 1. Police arrests among persons with mental disorders - Relevant but excluded studies*

| <b>Abbreviated reference</b> | <b>Primary exclusion reason</b>                                                                                                                        |
|------------------------------|--------------------------------------------------------------------------------------------------------------------------------------------------------|
| Boyce, 2015 (1)              | Not published in peer-reviewed journal                                                                                                                 |
| Brink, 2011 (2)              | Not published in peer-reviewed journal                                                                                                                 |
| Charette, 2011 (3)           | Focused on police involved samples                                                                                                                     |
| CIHI, 2008 (4)               | Not published in peer-reviewed journal                                                                                                                 |
| Franz, 2011 (5)              | Exclusive focus on police involved samples                                                                                                             |
| Hoch, 2009 (6)               | Exclusive focus on police involved samples                                                                                                             |
| Livingston, 2014 (7)         | Exclusive focus on police involved samples                                                                                                             |
| Phillips, 1998 (8)           | Exclusive focus on police involved samples                                                                                                             |
| Schuerman, 1984 (9)          | Arrest rates examined during a brief period                                                                                                            |
| Steadman, 2000 (10)          | Data not reported in such a way that a rate could be calculated for this indicator (reports on mental disturbance calls to police resulting in arrest) |
| Teplin, 1984 (11)            | Exclusive focus on police involved samples                                                                                                             |
| Watson, 2010 (12)            | Exclusive focus on police involved samples                                                                                                             |
| Wolff, 1997 (13)             | Arrest rates examined during a brief period                                                                                                            |

*Table 2. Police involvement in care pathway among persons with mental disorders - Relevant but excluded studies*

| <b>Abbreviated reference</b> | <b>Primary exclusion reasons</b>                                                                                                                 |
|------------------------------|--------------------------------------------------------------------------------------------------------------------------------------------------|
| Addington, 2002 (14)         | Data not reported in such a way that a rate could be calculated for this indicator (number of contacts rather than number of people reported)    |
| Charette, 2011 (3)           | Used only police-involved samples                                                                                                                |
| Dix, 1968 (15)               | Data not reported in such a way that a rate could be calculated for this indicator (insufficient detail given)                                   |
| Durbin, 2010 (16)            | Data not reported in such a way that a rate could be calculated for this indicator (total number of people with mental illnesses not gathered)   |
| Hollander, 2012 (17)         | Data not reported in such a way that a rate could be calculated for this indicator (sample consists of police, not people with mental illnesses) |
| Jarvis, 2005 (18)            | Data not reported in such a way that a rate could be calculated for this indicator ( police and ambulance transport combined)                    |
| Liberman, 1969 (19)          | Data not reported in such a way that a rate could be calculated for this indicator (proportions reported are based on rough estimates)           |
| Livingston, 2014 (7)         | Exclusive focus on police involved samples                                                                                                       |
| Macnaughton, 1998 (20)       | Not published in peer-reviewed journal                                                                                                           |
| Ritter, 2011 (21)            | Exclusive focus on police involved samples                                                                                                       |

*Table 3. Police calls for service involving people with mental disorders - Relevant but excluded studies*

| <b>Abbreviated reference</b> | <b>Primary exclusion reasons</b>                                                                                                                                                            |
|------------------------------|---------------------------------------------------------------------------------------------------------------------------------------------------------------------------------------------|
| Cocozza, 1978 (22)           | Data not reported in such a way that a rate could be calculated for this indicator (reported total proportion of arrests involving a cohort of people released from psychiatric facilities) |
| Deane, 1999 (23)             | Data not reported in such a way that a rate could be calculated for this indicator (survey of police)                                                                                       |
| Ellis, 2014 (24)             | Data not reported in such a way that a rate could be calculated for this                                                                                                                    |

|                         |                                                                                                                                                                                                     |
|-------------------------|-----------------------------------------------------------------------------------------------------------------------------------------------------------------------------------------------------|
|                         | indicator (survey of police)                                                                                                                                                                        |
| Godfredson, 2011 (25)   | Data not reported in such a way that a rate could be calculated for this indicator (police officers estimated the proportion of their weekly encounters that involved people with mental illnesses) |
| Ho, 2007 (26)           | Data not reported in such a way that a rate could be calculated for this indicator (focused on incidents involving conducted electrical weapons, not calls for service)                             |
| Hollander, 2012 (17)    | Data not reported in such a way that a rate could be calculated for this indicator (survey of police)                                                                                               |
| James, 2000 (27)        | Exclusive focus on samples detained in police custody                                                                                                                                               |
| Kerr, 2010 (28)         | Data not reported in such a way that a rate could be calculated for this indicator (survey of police)                                                                                               |
| Kesic, 2013 (29)        | Exclusive focus on use of force incidents                                                                                                                                                           |
| Long Beach, 1999 (30)   | Not published in peer-reviewed journal                                                                                                                                                              |
| Ritter, 2011 (21)       | Exclusive focus on calls to police/mental health crisis teams                                                                                                                                       |
| Robertson, 1996 (31)    | Exclusive focus on samples detained in police custody                                                                                                                                               |
| Steadman, 1997 (32)     | Not published in peer-reviewed journal                                                                                                                                                              |
| Wilson-Bates, 2008 (33) | Not published in peer-reviewed journal                                                                                                                                                              |
| Wix, 1994 (34)          | Exclusive focus on samples detained in police custody                                                                                                                                               |

## References

1. Boyce J, Rotenberg C, Karam M: Mental health and contact with police in Canada, 2012: Canadian Centre for Justice Statistics, Statistics Canada, 2015
2. Brink J, Livingston JD, Desmarais SL, et al.: A study of how people with mental illness perceive and interact with the police. Calgary, Alberta: Mental Health Commission of Canada, 2011
3. Charette Y, Crocker AG, Billette I: The judicious judicial dispositions juggle: Characteristics of police interventions involving people with a mental illness. *Canadian Journal of Psychiatry* 56:677-85, 2011
4. Canadian Institute for Health Information: Improving the Health of Canadians: Mental Health, Delinquency and Criminal Activity. Ottawa, ON, CAN: Canadian Institute for Health Information, 2008
5. Franz S, Borum R: Crisis Intervention Teams may prevent arrests of people with mental illnesses. *Police practice and research: an international journal* 12:265-72, 2011
6. Hoch J, Hartford K, Heslop L, et al.: Mental illness and police interactions in a mid-sized Canadian city: What the data do and do not say. *Canadian Journal of Community Mental Health* 28:49-66, 2009
7. Livingston JD, Desmarais SL, Verdun-Jones S, et al.: Perceptions and experiences of people with mental illness regarding their interactions with police. *International Journal of Law and Psychiatry* 37:334-40, 2014
8. Phillips M, Wolf A: Psychiatry and the criminal justice system: Testing the myths. *Am J Psychiatry* 145:605-10, 1988
9. Schuerman LA, Kobrin S: Exposure of community mental health clients to the criminal justice system; in *Mental Health and Criminal Justice*. Edited by Teplin LA. Beverly Hills: Sage Publications, 1984
10. Steadman H, Deane M, Borum R, et al.: Comparing outcomes of major models of police responses to mental health emergencies. *Psychiatric Services* 51:645-9, 2000
11. Teplin LA: Criminalizing mental disorder: The comparative arrest rate of the mentally ill. *American Psychologist* 39:794-803, 1984
12. Watson AC, Angell B, Vidalon T, et al.: Measuring perceived procedural justice and coercion among persons with mental illness in police encounters: The Police Contact Experience Scale. *Journal of Community Psychology* 38:206-26, 2010
13. Wolff N, Diamond RJ, Helminiak TW: A new look at an old issue: People with mental illness and the law enforcement system. *Journal of Mental Health Administration* 24:152-65, 1997
14. Addington J, Van Mastrigt S, Hutchinson J, et al.: Pathways to care: Help seeking behaviour in first episode psychosis. *Acta Psychiatrica Scandinavica* 106:358-64, 2002
15. Dix G: Acute psychiatric hospitalization of the mentally ill in the metropolis: An empirical study. *Wash ULQ*:485, 1968
16. Durbin J, Lin E, Zaslavka N: Police-citizen encounters that involve mental health concerns: Results of an Ontario police services survey. *Canadian Journal of Community Mental Health* 29:53-71, 2010

17. Hollander Y, Lee S, Tahtalian S, et al.: Challenges relating to the interface between crisis mental health clinicians and police when engaging with people with a mental illness. *Psychiatry, Psychology and Law* 19:402-11, 2012
18. Jarvis GE, Kirmayer LJ, Jarvis GK, et al.: The role of Afro-Canadian status in police or ambulance referral to emergency psychiatric services. *Psychiatric Services* 56:705-10, 2005
19. Liberman R: Police as a community mental health resource. *Community Mental Health Journal* 5:111-20, 1969
20. Macnaughton E: *The BC Early Intervention Study: Report of Findings*. Edited by Canadian Mental Health Association BD. Vancouver, 1998
21. Ritter C, Teller J, Marcussen K, et al.: Crisis intervention team officer dispatch, assessment, and disposition: Interactions with individuals with severe mental illness. *International Journal of Law and Psychiatry* 34:30-8, 2011
22. Coccozza JJ, Melick ME, Steadman HJ: Trends in violent crime among ex-mental patients. *Criminology* 16:317-34, 1978
23. Deane MW, Steadman HJ, Borum R, et al.: Emerging partnerships between mental health and law enforcement. *Psychiatric Services* 50:99-101, 1999
24. Ellis HA: Effects of a Crisis Intervention Team (CIT) training program upon police officers before and after Crisis Intervention Team training. *Archives of Psychiatric Nursing* 28:10-6, 2014
25. Godfredson JW, Thomas SDM, Ogloff JRP, et al.: Police perceptions of their encounters with individuals experiencing mental illness: A Victorian survey. *Australian and New Zealand Journal of Criminology* 44:180-95, 2011
26. Ho JD, Dawes DM, Johnson MA, et al.: Impact of conducted electrical weapons in a mentally ill population: a brief report. *American Journal of Emergency Medicine* 25:780-5, 2007
27. James D: Police station diversion schemes: Role and efficacy in central London. *Journal of Forensic Psychiatry* 11:532-55, 2000
28. Kerr A, Morabito M, Watson A: Police encounters, mental illness, and injury: An exploratory investigation. *Journal of Police Crisis Negotiations* 10:116-32, 2010
29. Kesic D, Thomas SDM, Ogloff JRP: Estimated rates of mental disorders in, and situational characteristics of, incidents of nonfatal use of force by police. *Social Psychiatry and Psychiatric Epidemiology* 48:225-32, 2013
30. Long Beach Police Department: *Mental Evaluation Team (MET) Project*. Long Beach, CA, 1999
31. Robertson G, Pearson R, Gibb R: The entry of mentally disordered people to the criminal justice system. *British Journal of Psychiatry* 169:172-80, 1996
32. Steadman HJ, Morrisey JP, Deane MW, et al.: Police response to emotionally disturbed persons: Analyzing new models of police interactions with the mental health system. United States, 1997
33. Wilson-Bates F: *Lost in transition: How a lack of capacity in the mental health system is failing Vancouver's mentally ill and draining police resources*. Vancouver, BC, Canada: Vancouver Police Dept., 2008
34. Wix S: Keeping on the straight and narrow: diversion of mentally disordered offenders at the point of arrest. *Psychiatric Care* 1:102-4, 1994
